# Supplementary material for: A meta-analysis of gene expression quantitative trait loci in brain
Source: PubMed Central journal article supplement — Transl Psychiatry. 2014 Oct 7;4(10):e459–. doi: 10.1038/tp.2014.96 (PMC4350525; doi:10.1038/tp.2014.96), 2014-10-07
Supplement: tp201496x1.pdf [file tp201496x1.pdf]

## Supplementary Material

A meta-analysis of gene expression quantitative trait loci in brain, Kim et al.

### Table of Contents

|                                                                       |           |
|-----------------------------------------------------------------------|-----------|
| <b>SUPPLEMENTAL METHODS</b>                                           | <b>2</b>  |
| CORTICAL GENE EXPRESSION DATA                                         | 2         |
| GENOTYPE DATA                                                         | 3         |
| IMPUTATION OF GENOTYPE DATA                                           | 3         |
| EVALUATION OF COVARIATES FOR GENE EXPRESSION                          | 4         |
| <b>SUPPLEMENTAL FIGURES</b>                                           | <b>7</b>  |
| FIGURE S1. PC1 VS PC2 WITH HAPMAP3 SAMPLES                            | 7         |
| FIGURE S2. PCA SCREE PLOTS                                            | 8         |
| FIGURE S3. SCREE PLOTS OF LAMBDA VERSUS PCs                           | 9         |
| FIGURE S4. T-STATISTICS FROM ADJUSTMENT OF GENOMIC PC1 VS PC1-5       | 10        |
| FIGURE S5. LOCAL AND DISTANT EQTLs IN COLANTUONI ET AL.               | 11        |
| FIGURE S6. LOCAL AND DISTANT EQTLs IN GIBBS ET AL.                    | 12        |
| FIGURE S7. LOCAL AND DISTANT EQTLs IN GTEx                            | 13        |
| FIGURE S8. LOCAL AND DISTANT EQTLs IN MYERS ET AL.                    | 14        |
| FIGURE S9. LOCAL AND DISTANT EQTLs IN SMRI                            | 15        |
| FIGURE S10. EQTL DISTANCE TO TRANSCRIPTION START SITE (GENOMIC PC1)   | 16        |
| FIGURE S11. EQTL DISTANCE TO TRANSCRIPTION START SITE (GENOMIC PC1-5) | 17        |
| FIGURE S12. EQTLs AND SCHIZOPHRENIA-ASSOCIATED <i>CNNM2</i> REGION    | 18        |
| FIGURE S13. EQTLs AND SCHIZOPHRENIA-ASSOCIATED <i>ITIH3</i> REGION    | 19        |
| FIGURE S14. SIGNIFICANT EQTL GENES EXPRESSED IN BRAIN AND BLOOD       | 20        |
| FIGURE S15. DAPPLE PROTEIN-PROTEIN INTERACTION GRAPH                  | 21        |
| <b>SUPPLEMENTAL TABLES</b>                                            | <b>22</b> |
| TABLE S1. SIGN TEST BETWEEN ALL PAIRS OF STUDIES                      | 22        |
| TABLE S2. EQTL SNP-GENE PAIRS AT VARYING FDR CUTOFFS (GENOMIC PC1)    | 22        |
| TABLE S3. EQTL SNP-GENE PAIRS AT VARYING FDR CUTOFFS (GENOMIC PC1-5)  | 22        |
| TABLE S4. FUNCTIONAL CONSEQUENCES OF EQTL SNPs VERSUS RANDOM SNPs     | 23        |
| TABLE S5. TOP PREDICTED GENES FOR SCHIZOPHRENIA USING SHERLOCK        | 24        |
| TABLE S6. TOP ANNOTATION CLUSTERS IDENTIFIED BY DAVID                 | 26        |
| TABLE S7. TOP 50 GENE ONTOLOGY PATHWAYS IDENTIFIED BY INRICH          | 27        |
| <b>REFERENCES</b>                                                     | <b>29</b> |

## Supplemental Methods

### Cortical gene expression data

We included brain cortical samples from neuropathologically normal subjects of European ancestry and aged  $\geq 20$  years at death. Below is definition of “neuropathologically normal” found from each study.

- In Colantuoni et al., it was defined “without neuropathological or neuropsychiatric diagnosis”.
- In Gibbs et al., it was defined “neurologically normal”.
- In Myers et al., it was defined “no Lewy bodies or co-morbidity with any other known neurological disease”.
- In Stanley Medical Research Institute (SMRI), we selected “control” samples.
- In the NIH GTEx project, it was defined as following: “donors of either sex from any ancestry group with aged 21-70 were collected. Medical exclusionary criteria include HIV infection, high-risk behaviors, viral hepatitis, metastatic cancer, chemotherapy or radiation therapy for any condition within the past 2 years, and whole-blood transfusion in the past 48 hours or BMI of  $>35$  or  $<18.5$ .” We used 24 pre-frontal cortex samples from 2012 December freeze data.

We obtained raw expression intensity files from the Gene Expression Omnibus (GEO, <http://www.ncbi.nlm.nih.gov/geo>), the Stanley Medical Research Institute project (SMRI, <http://www.stanleygenomics.org>), and the Genotype-Tissue Expression (GTEx, <http://www.gtexportal.org>). We conducted extensive and consistent quality control procedures for all expression data. As in our prior work, we processed gene expression data as consistently as possible across studies.<sup>1</sup> First, for all gene expression arrays, we mapped probe sequences to the genome (UCSC hg19) using Bowtie<sup>2</sup> and removed probes that did not map, mapped to multiple locations, or intersected a polymorphic SNP (HapMap3<sup>3</sup> and 1000 Genomes Project data<sup>4</sup>) because such probes can result in inaccurate expression.<sup>5</sup> Second, we excluded outlier samples based on inter-sample correlations<sup>6</sup> or if phenotypic sex did not match mean expression of probesets on chrX and chrY. Third, we used hierarchical clustering (R function hclust, average link function) and principal component analysis (PCA) in order to evaluate overall performance of all arrays. Below is a summary table showing data sources, brain regions, and quality control steps for all studies.

| Feature                        |                                | Colantuoni <sup>7</sup>                                                                  | Gibbs <sup>8</sup>                                                                                   | GTEx <sup>9</sup>                                                         | Myers <sup>10</sup>                           | SMRI <sup>11,12</sup>                                                 |
|--------------------------------|--------------------------------|------------------------------------------------------------------------------------------|------------------------------------------------------------------------------------------------------|---------------------------------------------------------------------------|-----------------------------------------------|-----------------------------------------------------------------------|
| Data source                    |                                | GSE30272                                                                                 | GSE15745                                                                                             | GTEx (2012 Dec freeze)                                                    | GSE8919                                       | Arrays from Altar group                                               |
| Sample size                    |                                | 56                                                                                       | 124                                                                                                  | 24                                                                        | 189                                           | 31                                                                    |
| Cortical region                |                                | Frontal                                                                                  | Frontal                                                                                              | Frontal                                                                   | Frontal, temporal                             | Frontal                                                               |
| Technology                     |                                | IL Human 49K Oligo array                                                                 | IL HumanRef-8                                                                                        | RNA-seq (IL HiSeq 2000)                                                   | IL HumanRef-8                                 | AF HG-U133a                                                           |
| Normalization (study-specific) |                                | Background correction, normalization using loess and then using quantile method in limma | Background correction, log <sub>2</sub> transformation, normalization using quantile method in limma | Gene read counts, normalization, <sup>a</sup> gene exclusion <sup>b</sup> | Used processed data as raw data not available | Robust multiarray average (RMA) from Affymetrix Power Tools (v1.12.0) |
| QC (common)                    | Probe mapping <sup>c</sup>     | ✓                                                                                        | ✓                                                                                                    | ✓                                                                         |                                               | ✓                                                                     |
|                                | Outlier exclusion <sup>d</sup> | ✓                                                                                        | ✓                                                                                                    | ✓                                                                         | ✓                                             | ✓                                                                     |

<sup>a</sup> We started with read counts per gene and normalized samples by dividing scale factors that were calculated by the ratio of 75% quantile read count in each sample over the mean among all the samples. Read count data were inverse-quantile normalized within each sample. <sup>b</sup> Genes were excluded if > 90% of samples had read counts < 1. <sup>c</sup> After mapping probe sequences to hg19 using Bowtie, we removed probes with sequences not mapping, mapping to multiple genomic locations, or intersecting a polymorphic SNP. <sup>d</sup> We removed outlier samples based on clustering, principal component analysis, inter-array correlations<sup>6</sup>, and sex inconsistency. Abbreviations: IL=Illumina, AF=Affymetrix.

## Genotype data

We obtained genotype data in PLINK format from dbGaP (<http://www.ncbi.nlm.nih.gov/gap>), as raw intensity files from SMRI (<http://www.stanleygenomics.org>) and from an author's website (<http://labs.med.miami.edu/myers>). For raw intensity files, we used Affymetrix Power Tools to call genotypes. We applied extensive and consistent quality control procedures described in the table below.

| Feature                   | Colantuoni <sup>7</sup>                                                                                                    | Gibbs <sup>8</sup>    | GTEX <sup>9</sup> | Myers <sup>10</sup>                                                           | SMRI <sup>11,12</sup>   |
|---------------------------|----------------------------------------------------------------------------------------------------------------------------|-----------------------|-------------------|-------------------------------------------------------------------------------|-------------------------|
| Data source               | dbGaP:pht002399.v2.p1                                                                                                      | dbGaP:pht001879.v1.p1 | dbGaP:phs000424   | <a href="http://labs.med.miami.edu/myers">http://labs.med.miami.edu/myers</a> | Arrays from Altar group |
| Sample size               | 113                                                                                                                        | 148                   | 183               | 193                                                                           | 93                      |
| Tissue                    | Cerebellum                                                                                                                 | Cerebellum            | Blood             | Cortex                                                                        | Frontal cortex          |
| Technology                | IL Hap650Yv3.0                                                                                                             | IL Hap550v3.0         | IL Omni5-Quad     | AF 500K                                                                       | AF 5.0                  |
| SNP exclusion criteria    | Call rate < 90%<br>MAF < 1%<br>HWE < 1e-8<br>Allele frequency inconsistency with 1000G reference panel                     |                       |                   |                                                                               |                         |
| Sample exclusion criteria | Call rate < 90%<br>Sex mismatch<br>Relatedness<br>Relative high IBD value with too many other subjects<br>Ancestry outlier |                       |                   |                                                                               |                         |
| Sample size after QC      | 108                                                                                                                        | 148                   | 155               | 191                                                                           | 93                      |

## Imputation of genotype data

We downloaded EUR data from the 1000G reference panel (phase1 release v3.20101123) from the MACH website. Prior to imputation, we performed initial QC in each study. We excluded samples that were related ( $\hat{\pi} > 0.04$ ), moderate relatedness with many subjects (indicating contamination or poor quality), low call-rate (< 0.9), inconsistent phenotype-genotype sex, and ancestry outliers detected by principal component analysis. We removed SNPs with low call rate (< 0.9), low minor allele frequency (< 0.01), deviation from Hardy-Weinberg equilibrium ( $P_{HWE} < 1 \times 10^{-8}$ ), and allele frequencies inconsistent with the 1000 Genomes Project reference panel (minor allele frequency difference < 0.07).

For each study, we imputed genotype dosages using the 1000 Genomes Project reference panel using MaCH-admix.<sup>13</sup> MaCH-admix does not require phasing before imputation, which is suitable for small studies. ChrX was imputed in males using the option in MaCH-admix and females were imputed in the same way as autosomes. In order to evaluate the quality of imputed SNP, we computed average  $R^2$  under varying MAF categories and  $R^2$  cutoffs (see the summary tables below), which is similar to a procedure in a prior study.<sup>14</sup> We retained SNPs with imputation  $R^2 \geq 0.3$  and minor allele frequency greater than  $\max(0.05, \frac{5}{2N})$ .

| Colantuoni et al. | R <sup>2</sup> cutoffs |      |      |      |      |      |      |
|-------------------|------------------------|------|------|------|------|------|------|
| MAF               | 0.3                    | 0.35 | 0.4  | 0.45 | 0.5  | 0.55 | 0.6  |
| 0.01 – 0.03       | 0.71                   | 0.74 | 0.76 | 0.79 | 0.81 | 0.83 | 0.85 |
| 0.03 – 0.05       | 0.80                   | 0.82 | 0.83 | 0.85 | 0.86 | 0.88 | 0.89 |
| 0.05 - 0.5        | 0.90                   | 0.90 | 0.91 | 0.92 | 0.92 | 0.92 | 0.93 |

| Gibbs et al. | R <sup>2</sup> cutoffs |      |      |      |      |      |      |
|--------------|------------------------|------|------|------|------|------|------|
| MAF          | 0.3                    | 0.35 | 0.4  | 0.45 | 0.5  | 0.55 | 0.6  |
| 0.01 – 0.03  | 0.70                   | 0.73 | 0.76 | 0.78 | 0.80 | 0.82 | 0.84 |
| 0.03 – 0.05  | 0.79                   | 0.80 | 0.82 | 0.84 | 0.85 | 0.86 | 0.88 |
| 0.05 - 0.5   | 0.89                   | 0.90 | 0.90 | 0.91 | 0.91 | 0.92 | 0.92 |

| GTEEx       | R <sup>2</sup> cutoffs |      |      |      |      |      |      |
|-------------|------------------------|------|------|------|------|------|------|
| MAF         | 0.3                    | 0.35 | 0.4  | 0.45 | 0.5  | 0.55 | 0.6  |
| 0.01 – 0.03 | 0.74                   | 0.76 | 0.79 | 0.81 | 0.83 | 0.85 | 0.87 |
| 0.03 – 0.05 | 0.82                   | 0.84 | 0.85 | 0.87 | 0.88 | 0.90 | 0.91 |
| 0.05 - 0.5  | 0.92                   | 0.92 | 0.93 | 0.93 | 0.94 | 0.94 | 0.95 |

| Myres et al. | R <sup>2</sup> cutoffs |      |      |      |      |      |      |
|--------------|------------------------|------|------|------|------|------|------|
| MAF          | 0.3                    | 0.35 | 0.4  | 0.45 | 0.5  | 0.55 | 0.6  |
| 0.01 – 0.03  | 0.66                   | 0.69 | 0.72 | 0.74 | 0.77 | 0.79 | 0.81 |
| 0.03 – 0.05  | 0.71                   | 0.74 | 0.76 | 0.78 | 0.80 | 0.82 | 0.84 |
| 0.05 - 0.5   | 0.81                   | 0.83 | 0.84 | 0.85 | 0.86 | 0.87 | 0.88 |

| SMRI        | R <sup>2</sup> cutoffs |      |      |      |      |      |      |
|-------------|------------------------|------|------|------|------|------|------|
| MAF         | 0.3                    | 0.35 | 0.4  | 0.45 | 0.5  | 0.55 | 0.6  |
| 0.01 – 0.03 | 0.69                   | 0.72 | 0.75 | 0.77 | 0.80 | 0.82 | 0.84 |
| 0.03 – 0.05 | 0.74                   | 0.76 | 0.78 | 0.80 | 0.82 | 0.84 | 0.86 |
| 0.05 - 0.5  | 0.81                   | 0.83 | 0.84 | 0.85 | 0.86 | 0.87 | 0.88 |

| Study Name        | Number of SNPs retained after QC |
|-------------------|----------------------------------|
| Colantuoni et al. | 7,887,133                        |
| Gibbs et al.      | 7,874,224                        |
| GTEEx             | 7,780,852                        |
| Myers et al.      | 6,391,052                        |
| SMRI              | 6,779,110                        |

## Evaluation of covariates for gene expression

We selected covariates for gene expression in two steps. First, we assessed all covariates by computing the type III sum of squares (SAS, v9.2) which compares a full model containing all covariates to a

reduced model that excludes a covariate under consideration. The impact of a covariate was quantified by determining the number of genes with  $FDR < 0.05$ . We included a covariate when  $> 1\%$  of genes met this criterion. Second, we regressed out selected covariates and performed PCA on the residuals. The final covariate list included covariates from the first step and the significant PCs from the second step. For the genotype data from each study, we included the first PC. Below are summary tables showing number of significant genes from the first step of type III sum of squares test ( $q < 0.05$ ).

| Colantuoni et al. 14,914 genes | Type    | df | Significant genes |
|--------------------------------|---------|----|-------------------|
| Age                            | Numeric | 1  | 10                |
| pmi                            | Numeric | 1  | 0                 |
| sex                            | Factor  | 1  | 184               |
| pH                             | Numeric | 1  | 754               |
| RNA integrity number           | Numeric | 1  | 3104              |
| batch                          | Factor  | 13 | 6298              |

| Gibbs et al. 16,554 genes | Type    | df | Significant genes |
|---------------------------|---------|----|-------------------|
| Age                       | Numeric | 1  | 178               |
| pmi                       | Numeric | 1  | 1                 |
| sex                       | Factor  | 1  | 33                |
| Tissue bank               | Factor  | 2  | 1718              |
| batch                     | Factor  | 13 | 3247              |

| GTEX, 25,287 genes        | Type    | df | Significant genes |
|---------------------------|---------|----|-------------------|
| Age                       | Numeric | 1  | 0                 |
| Height                    | Numeric | 1  | 0                 |
| Weight                    | Numeric | 1  | 0                 |
| BMI                       | Numeric | 1  | 0                 |
| Donor ischemic time (min) | Numeric | 1  | 0                 |
| race                      | Factor  | 1  | 2                 |
| sex                       | Factor  | 1  | 0                 |
| Dthrdy (hardy scale)      | Factor  | 3  | 0                 |

| Myers et al. 15,857 genes                                        | Type    | df | Significant genes |
|------------------------------------------------------------------|---------|----|-------------------|
| Age                                                              | Numeric | 1  | 651               |
| pmi                                                              | Numeric | 1  | 0                 |
| sex                                                              | Factor  | 1  | 21                |
| Average transcript detection rate (all 24354 probes)             | Numeric | 1  | 0                 |
| Average transcript detection rate (14078 brain expressed probes) | Numeric | 1  | 0                 |
| Hybridization date                                               | Factor  | 8  | 8442              |
| Brain bank                                                       | factor  | 17 | 5416              |

| SMRI, 10,038 genes | Type    | df | Significant genes |
|--------------------|---------|----|-------------------|
| Age                | Numeric | 1  | 0                 |
| pmi                | Numeric | 1  | 0                 |
| sex                | Factor  | 1  | 8                 |
| pH                 | Numeric | 1  | 157               |
| Brain side         | Factor  | 1  | 0                 |

Below are summary tables showing number of significant genes from the second step of type III sum of squares test. The PCs below are computed from the expression data after residualizing out the effects of impactful covariates.

| Colantuoni et al.    | Type    | df | Significant genes |
|----------------------|---------|----|-------------------|
| sex                  | Factor  | 1  | 3555              |
| pH                   | Numeric | 1  | 5046              |
| RNA integrity number | Numeric | 1  | 5310              |
| batch                | Factor  | 13 | 11243             |
| PC1                  | Numeric | 1  | 6471              |
| PC2                  | Numeric | 1  | 6579              |
| PC3                  | Numeric | 1  | 3418              |
| PC4                  | Numeric | 1  | 2940              |
| PC5                  | Numeric | 1  | 1150              |

| Gibbs et al. | Type    | df | Significant genes |
|--------------|---------|----|-------------------|
| Age          | Numeric | 1  | 1816              |
| Tissue bank  | Factor  | 2  | 5890              |
| batch        | Factor  | 13 | 8186              |
| PC1          | Numeric | 1  | 9549              |
| PC2          | Numeric | 1  | 7426              |
| PC3          | Numeric | 1  | 6940              |
| PC4          | Numeric | 1  | 4436              |
| PC5          | Numeric | 1  | 6119              |

| GTEX | Type    | df | Significant genes |
|------|---------|----|-------------------|
| PC1  | Numeric | 1  | 12420             |
| PC2  | Numeric | 1  | 9074              |
| PC3  | Numeric | 1  | 7798              |
| PC4  | Numeric | 1  | 3489              |
| PC5  | Numeric | 1  | 1581              |

| Myers et al.       | Type    | df | Significant genes |
|--------------------|---------|----|-------------------|
| Age                | Numeric | 1  | 1157              |
| Hybridization date | Factor  | 8  | 9826              |
| Brain bank         | factor  | 17 | 7302              |
| PC1                | Numeric | 1  | 11328             |
| PC2                | Numeric | 1  | 0                 |
| PC3                | Numeric | 1  | 0                 |
| PC4                | Numeric | 1  | 0                 |
| PC5                | Numeric | 1  | 0                 |

| SMRI | Type    | df | Significant genes |
|------|---------|----|-------------------|
| pH   | Numeric | 1  | 5617              |
| PC1  | Numeric | 1  | 7238              |
| PC2  | Numeric | 1  | 5154              |
| PC3  | Numeric | 1  | 2523              |
| PC4  | Numeric | 1  | 988               |
| PC5  | Numeric | 1  | 1118              |

## Supplemental Figures

Figure S1. PC1 vs PC2 with HapMap3 samples

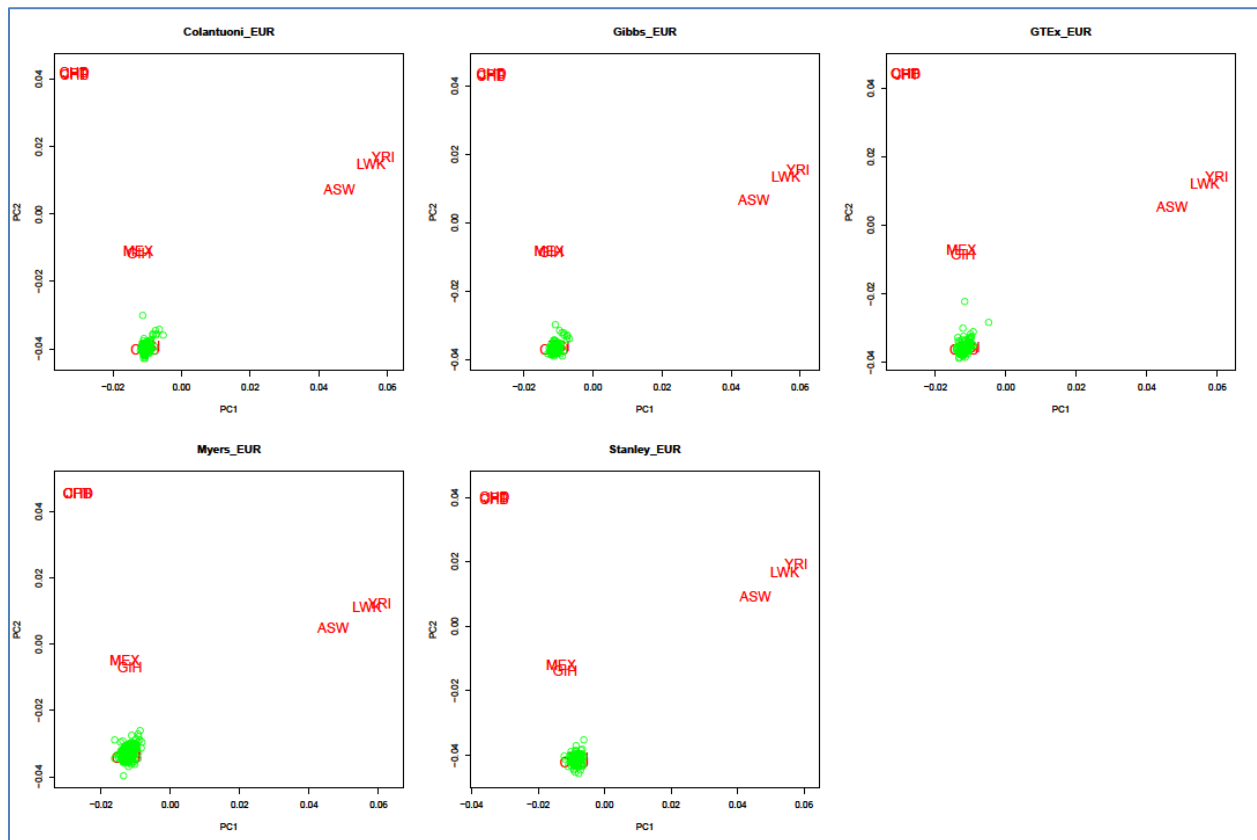

Green points indicate study samples remained after QC. Abbreviations: ASW (African ancestry in Southwest USA), CEU (Utah residents with Northern and Western European ancestry from CEPH collection), CHB (Han Chinese in Beijing, China), CHD (Chinese in Metropolitan Denver, Colorado), GIH (Gujarati Indians in Houston, Texas), JPT (Japanese in Tokyo, Japan), LWK (Luhya in Webuye, Kenya), MEX (Mexican ancestry in Los Angeles, California), MKK (Maasai in Kinyawa, Kenya), TSI (Toscans in Italy), YRI (Yoruba in Ibadan, Nigeria)

Figure S2. PCA scree plots

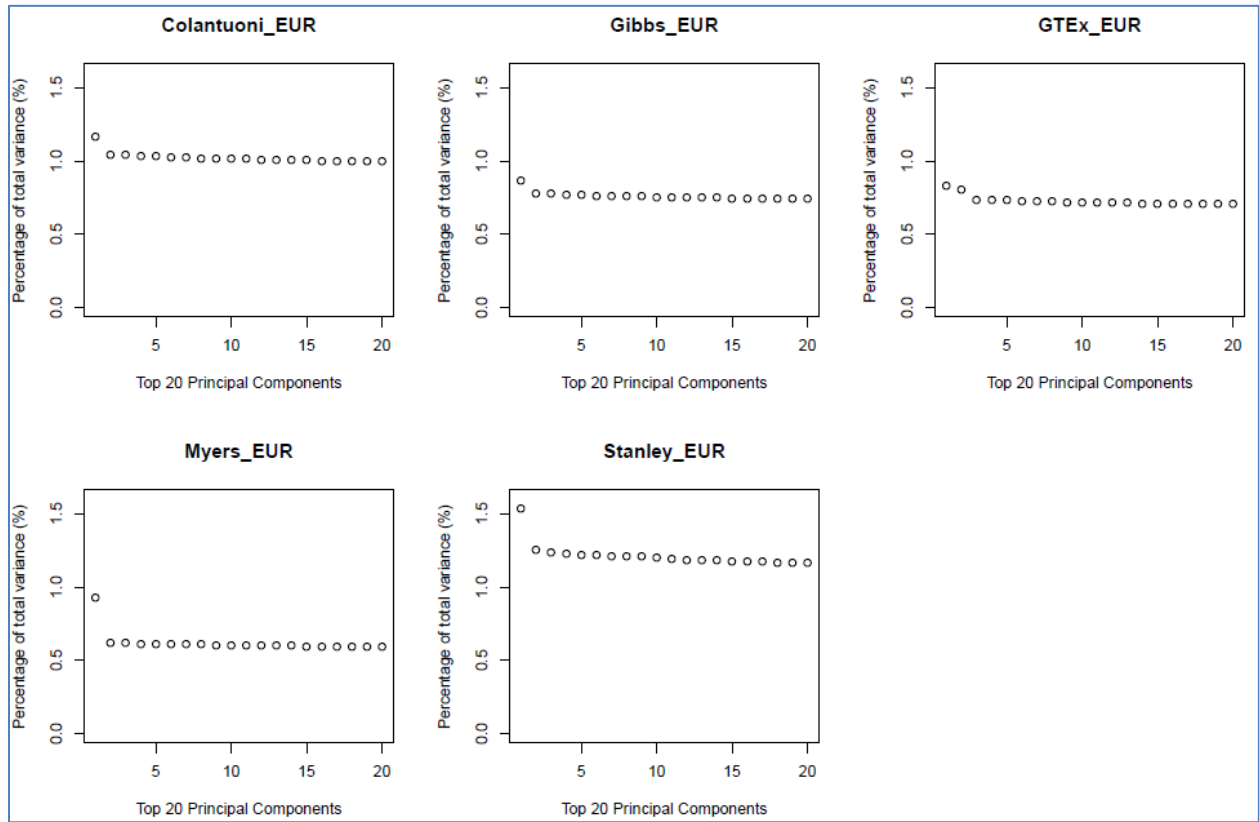

Scree plots show the proportion of total variance explained by each PC.



Figure S3. Scree plots of lambda versus PCs

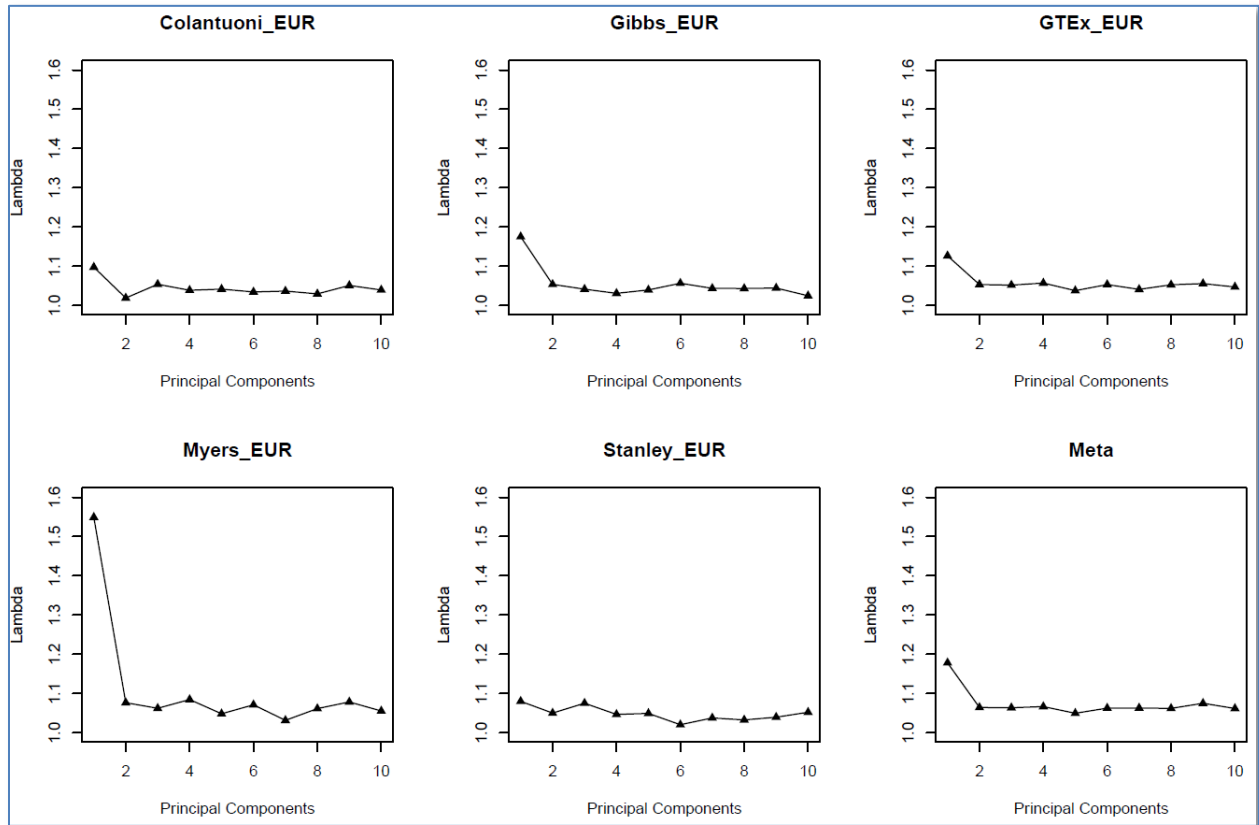

We tested genome-wide association between each genomic PC as a dependent variable and SNPs as independent variables and calculated the genomic inflation factor ( $\lambda$ ) from each association test. It shows the contribution of each PC to  $\lambda$ .

Figure S4. T-statistics from adjustment of genomic PC1 vs PC1-5

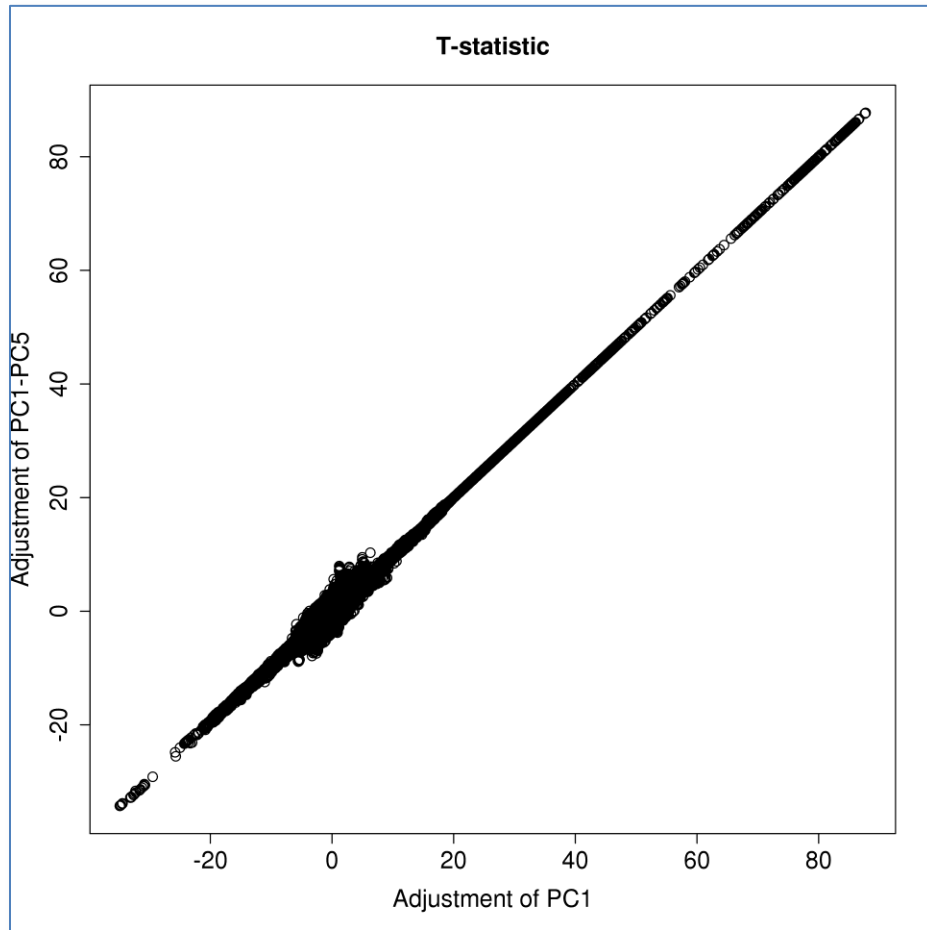

We evaluated whether adjustment of genomic PC1 should be enough or several more PCs may be needed to control for population sub-stratification. For the latter approach, we included PC1-PC5 in eQTL analysis for each study and meta-analyzed eQTLs using fixed effect model. A scatter plot of t-statistics from the two approaches show that the magnitude and direction are almost identical (Pearson's correlation=0.98).

Figure S5. Local and distant eQTLs in Colantuoni et al.

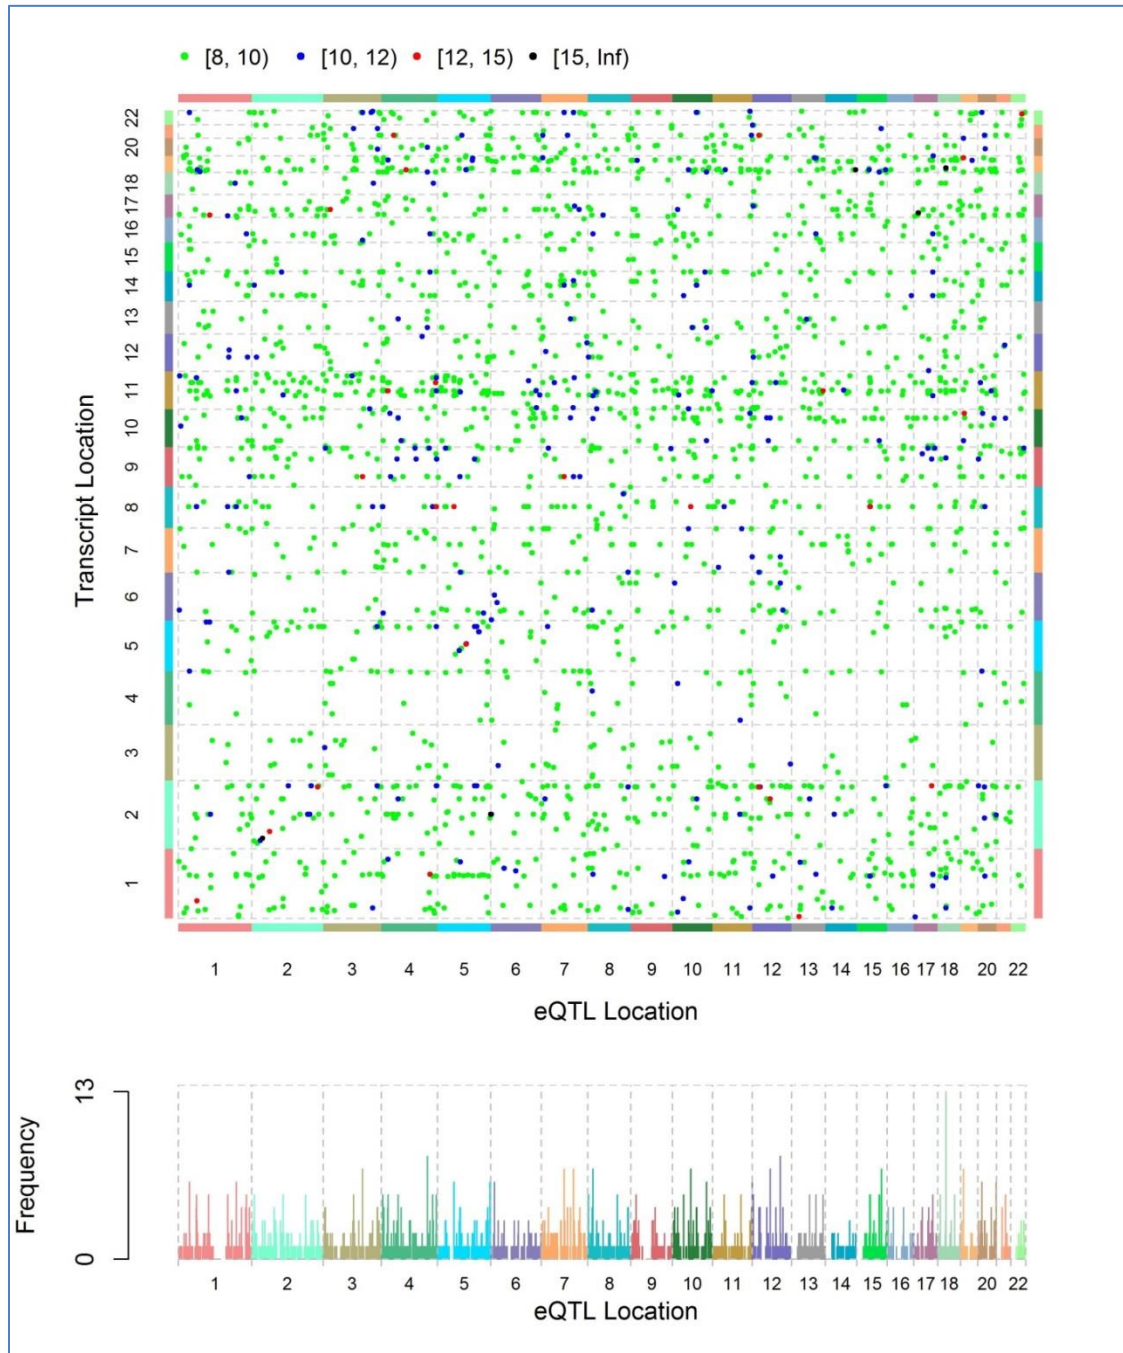

Upper panel: each dot represents  $-\log_{10}(\text{p-value})$  for SNP-gene eQTLs. Lower panel: eQTL hotspots, the number of significant eQTLs per SNP that pass the highest cutoff (eQTL with black color in upper panel).

Figure S6. Local and distant eQTLs in Gibbs et al.

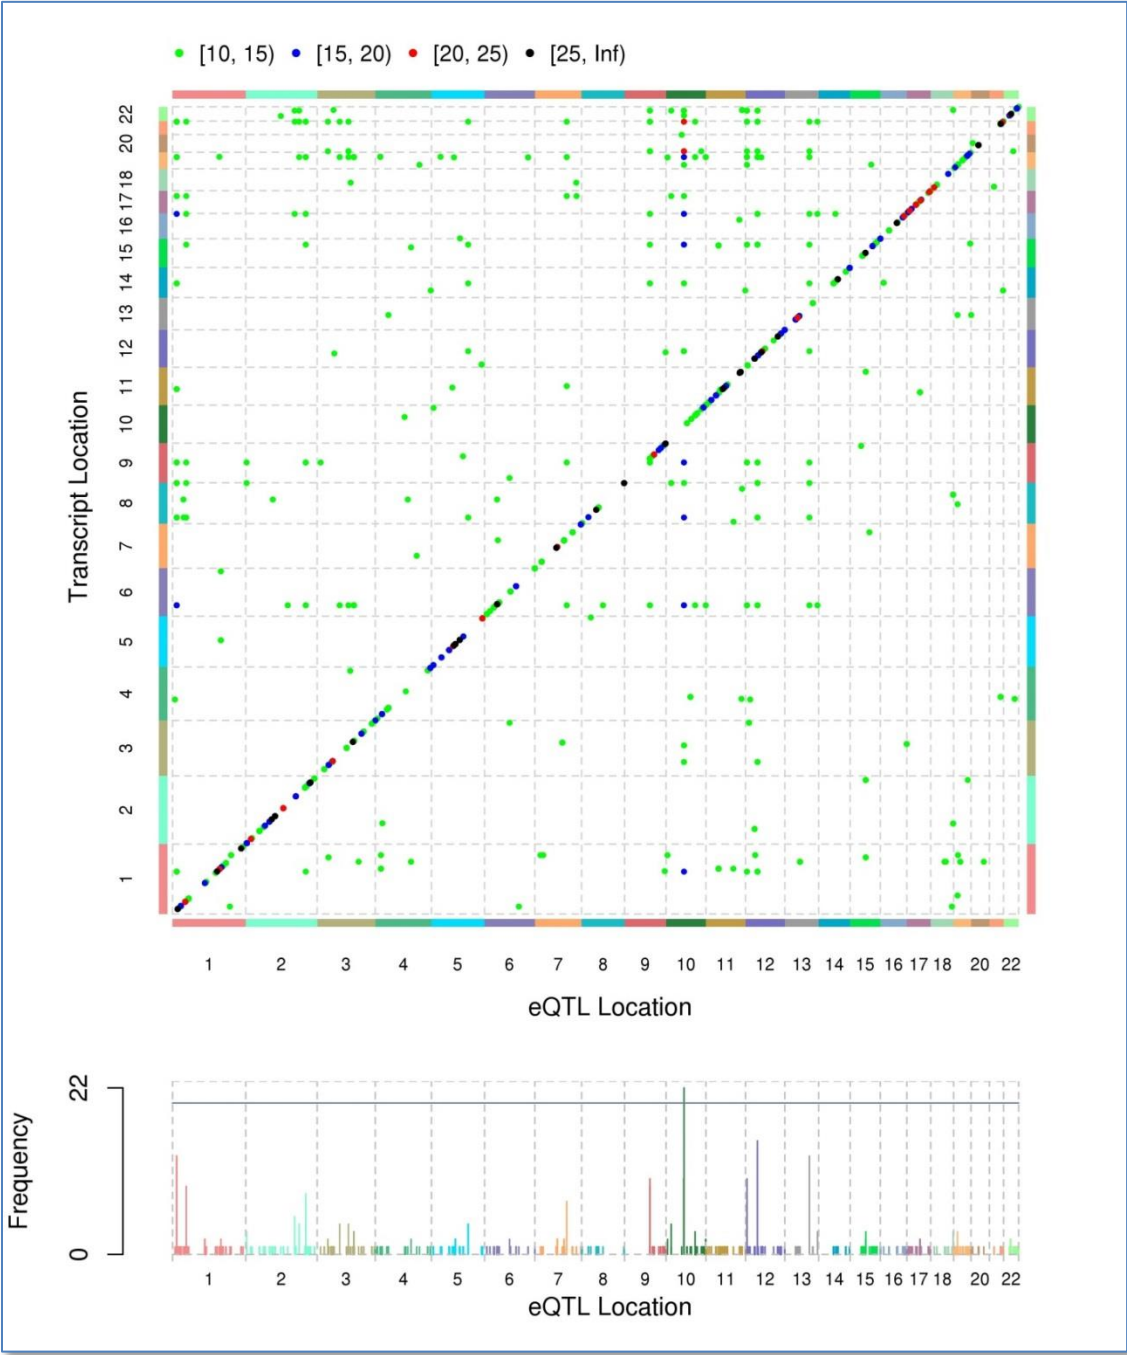

Figure legend is same as in Figure S6.

Figure S7. Local and distant eQTLs in GTEx

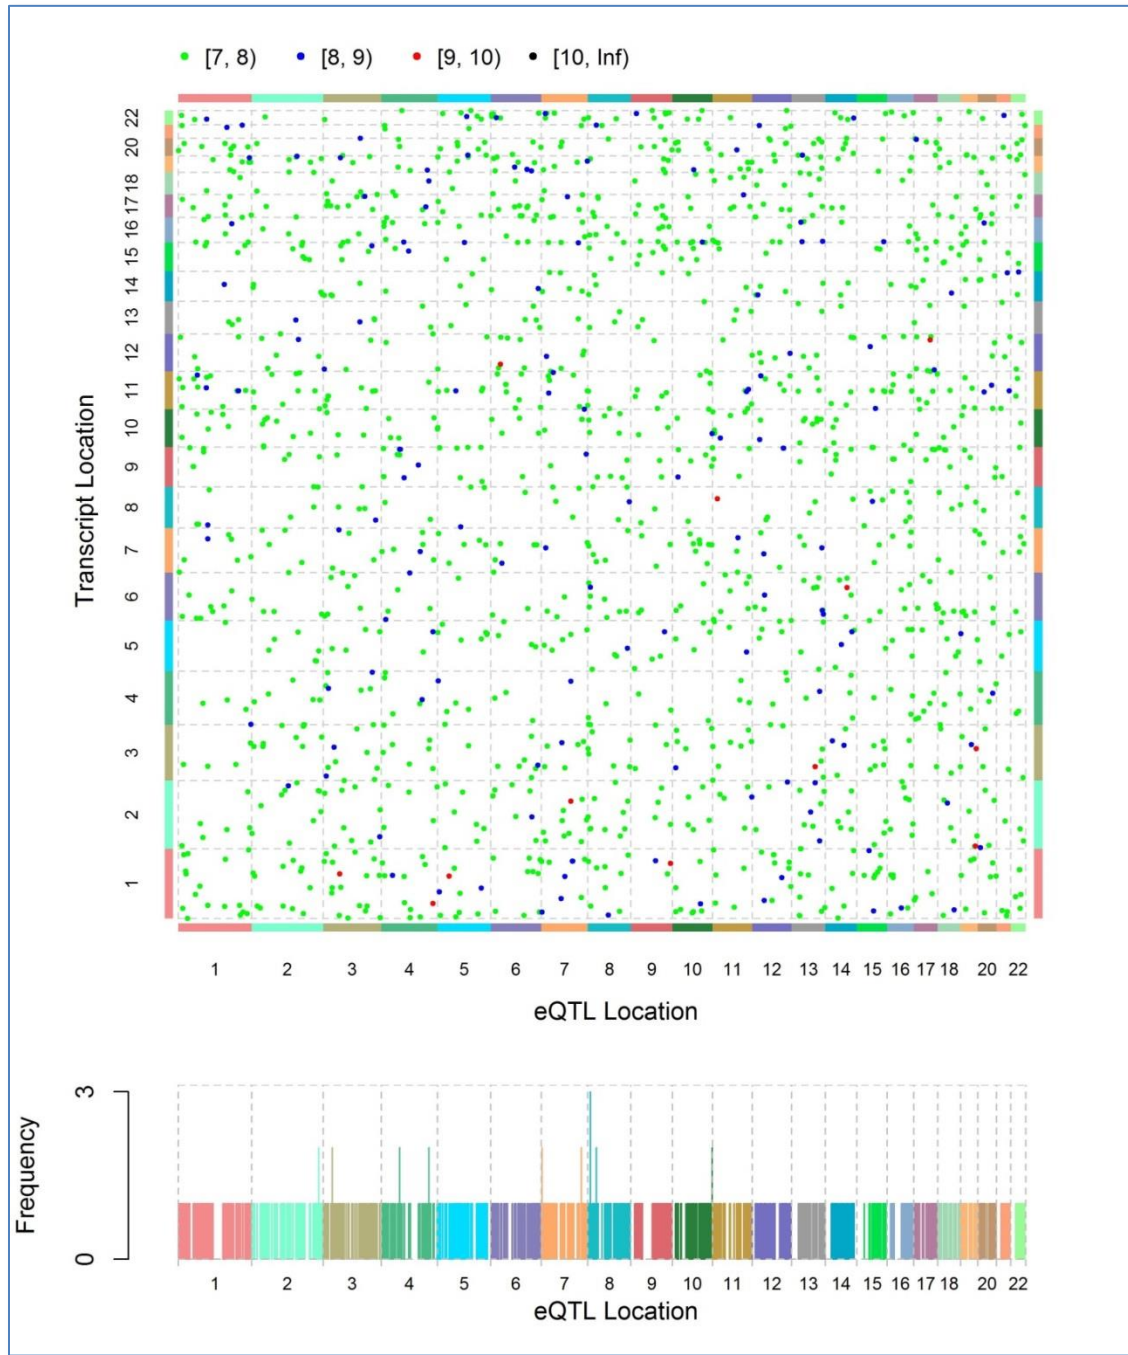

Figure legend is same as in Figure S6.

Figure S8. Local and distant eQTLs in Myers et al.

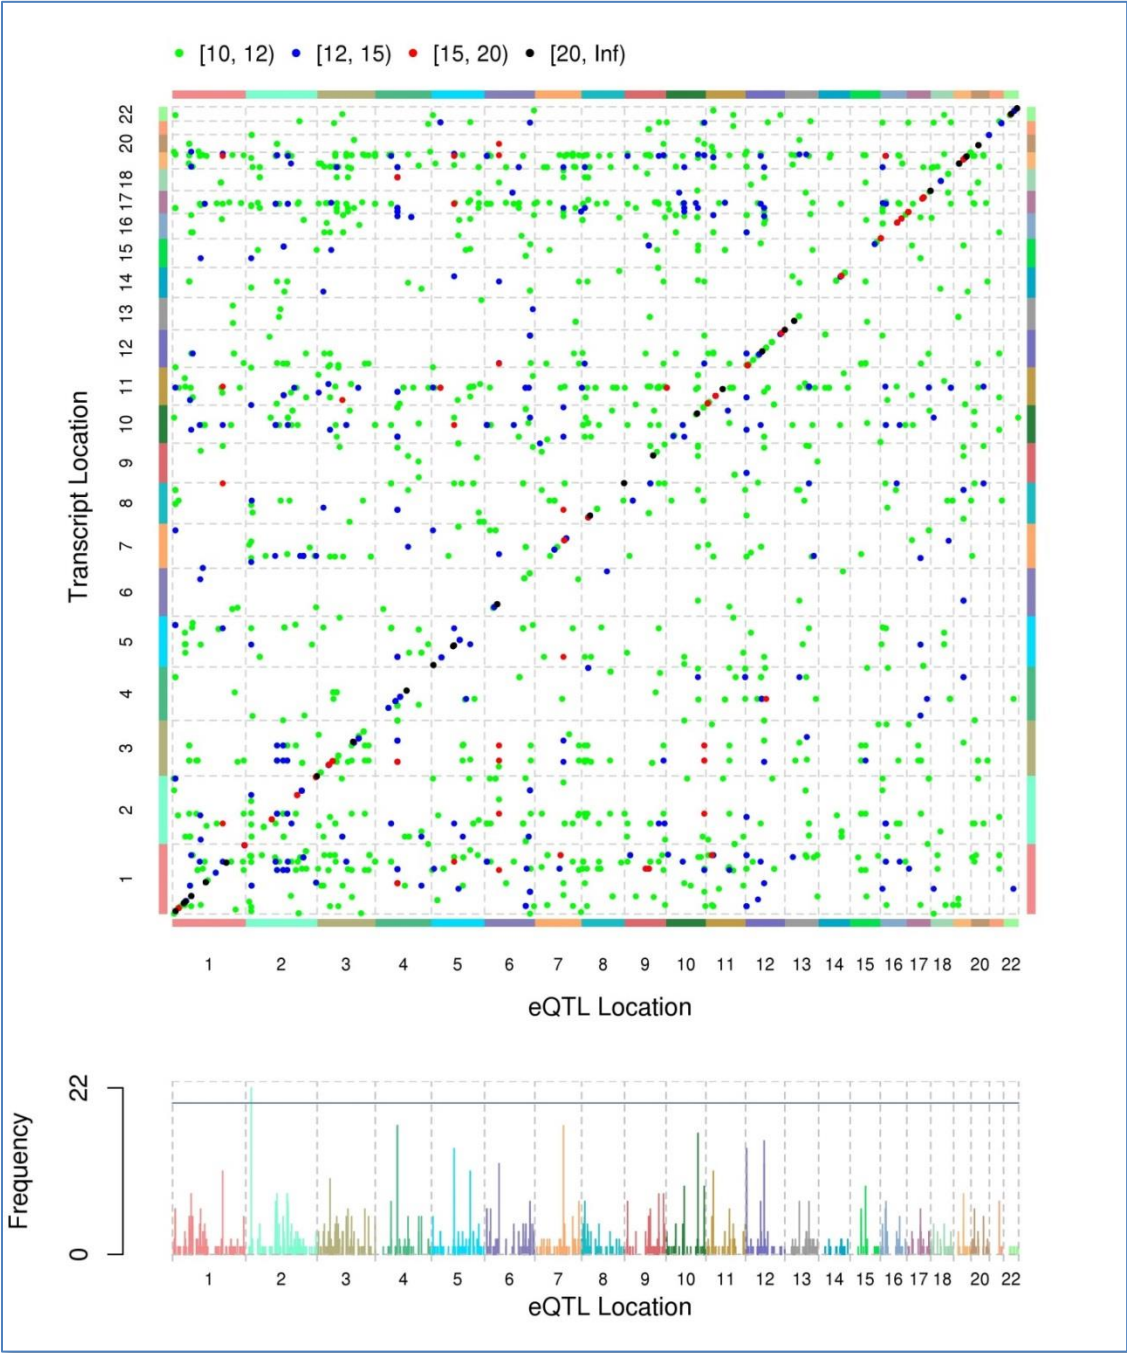

Figure legend is same as in Figure S6.

Figure S9. Local and distant eQTLs in SMRI

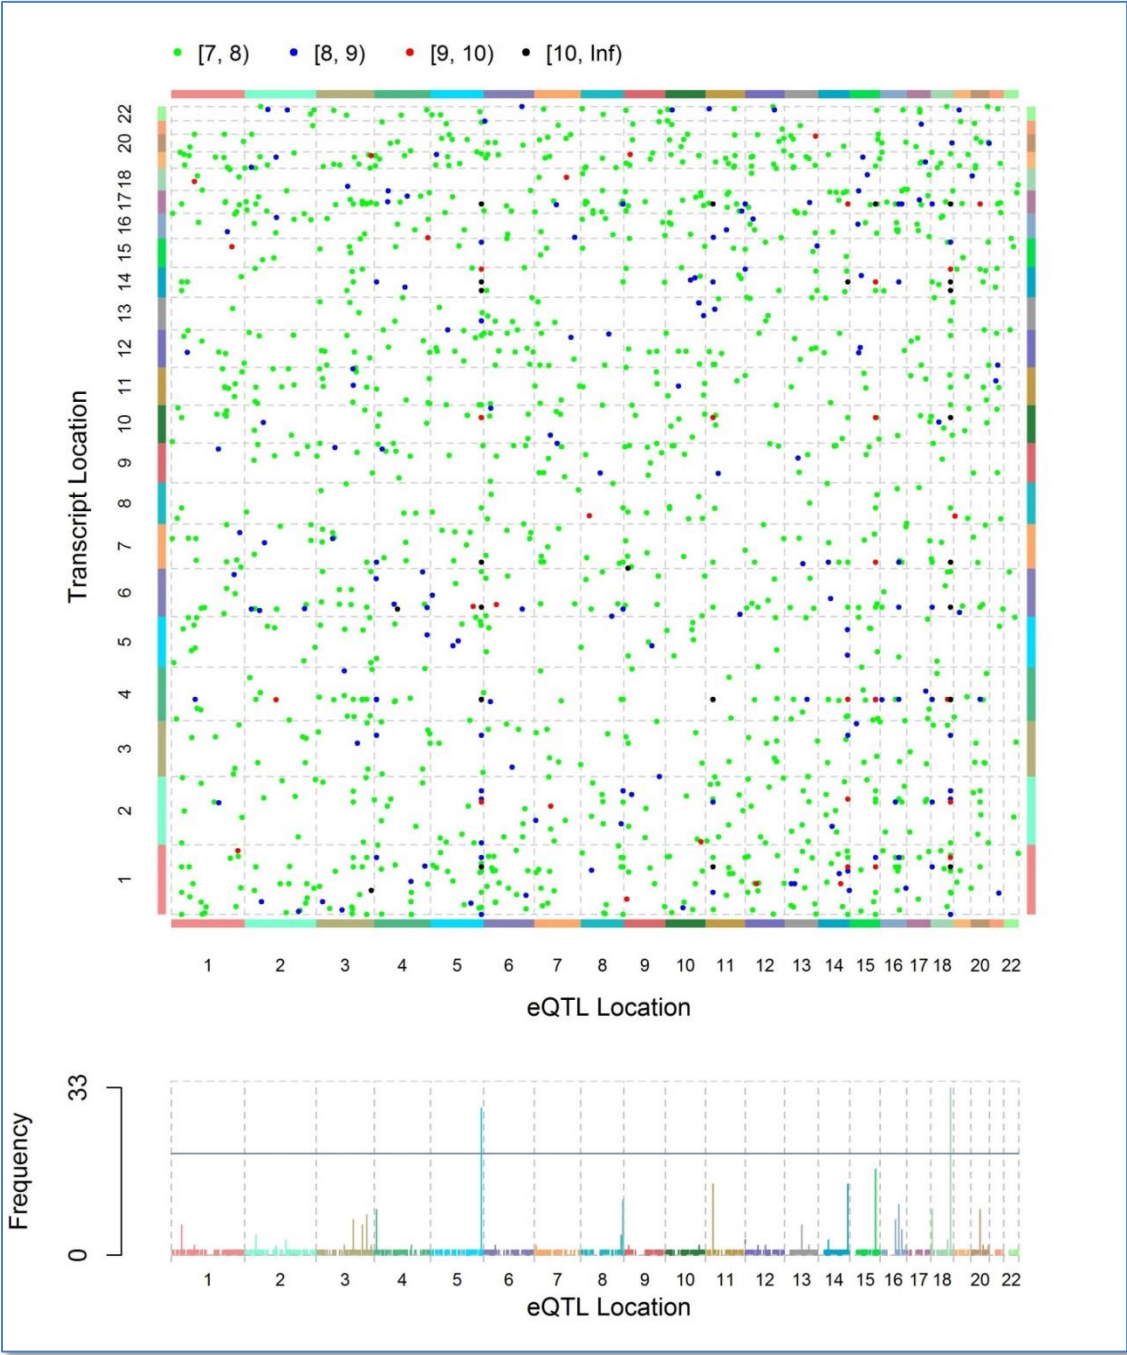

Figure legend is same as in Figure S6.

Figure S10. eQTL distance to transcription start site (genomic PC1)

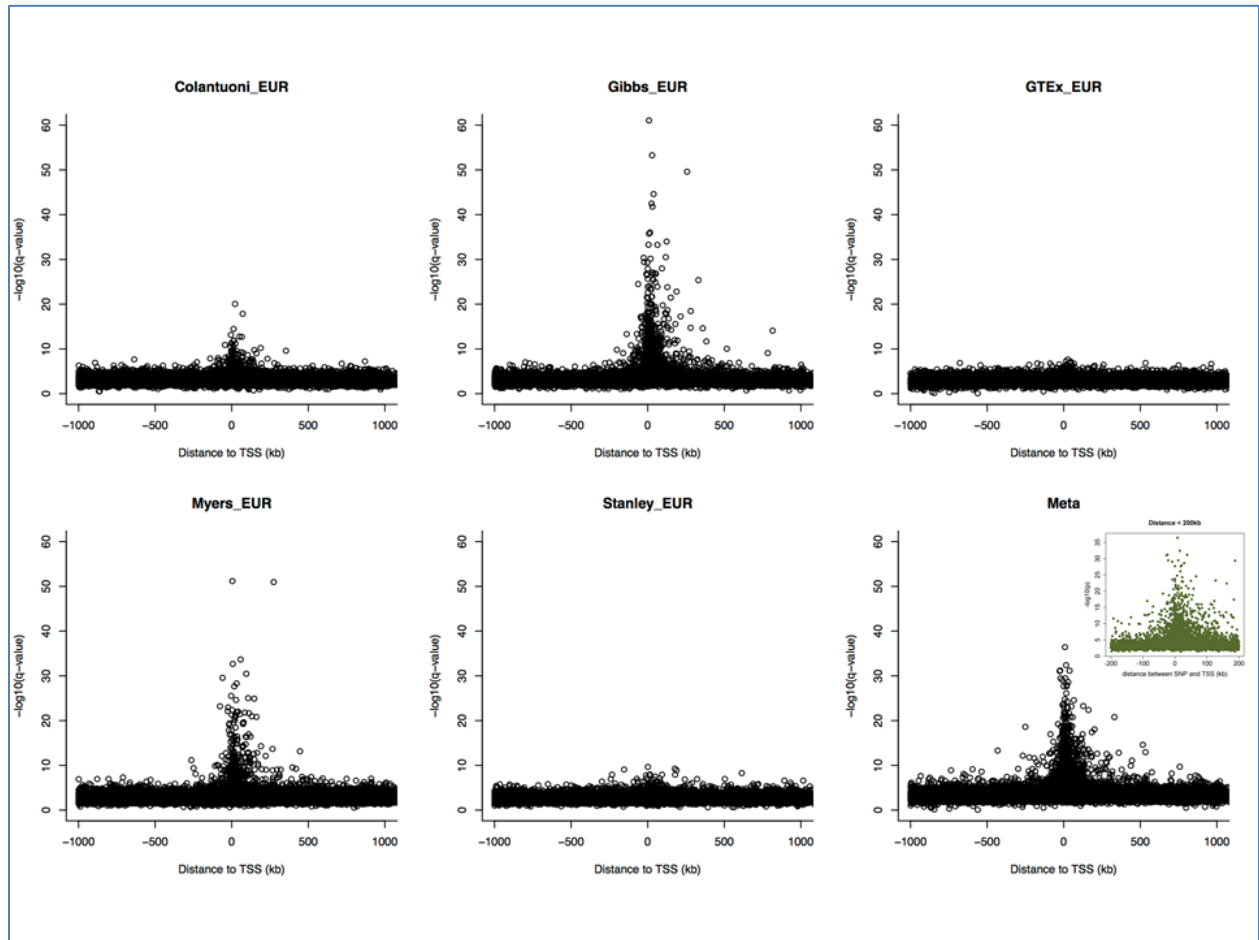

Shown are the distribution of distances and significance between genes and their most associated eQTL SNPs when genomic PC1 was included in eQTL analysis. Each point represents the most significant eQTL SNP per gene. X-axis shows the distance between the transcription start site of gene and the SNP location. Y-axis indicates  $-\log_{10}(\text{q-value})$ . The inset depicts  $-\log_{10}(\text{q-value})$  of meta-analysis results when distances to TSS are  $< 200\text{kb}$ .



Figure S11. eQTL distance to transcription start site (genomic PC1-5)

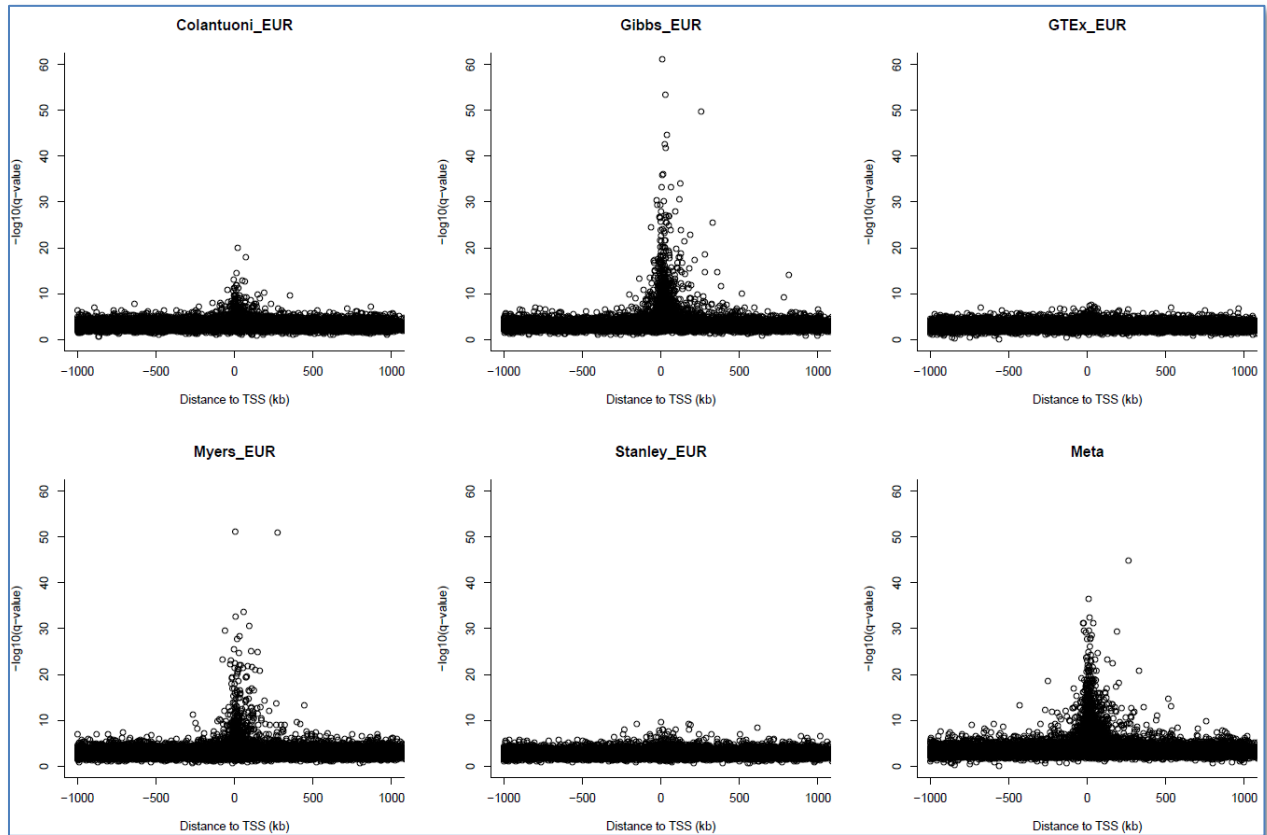

Shown are the distribution of distances and significance between genes and their most associated eQTL SNPs when genomic PC1-PC5 were included in eQTL analysis. Each point represents the most significant eQTL SNP per gene. X-axis shows the distance between the transcription start site of gene and the SNP location. Y-axis indicates  $-\log_{10}(q\text{-value})$ . We note that this is almost identical to Figure S11.

Figure S12. eQTLs and schizophrenia-associated *CNNM2* region

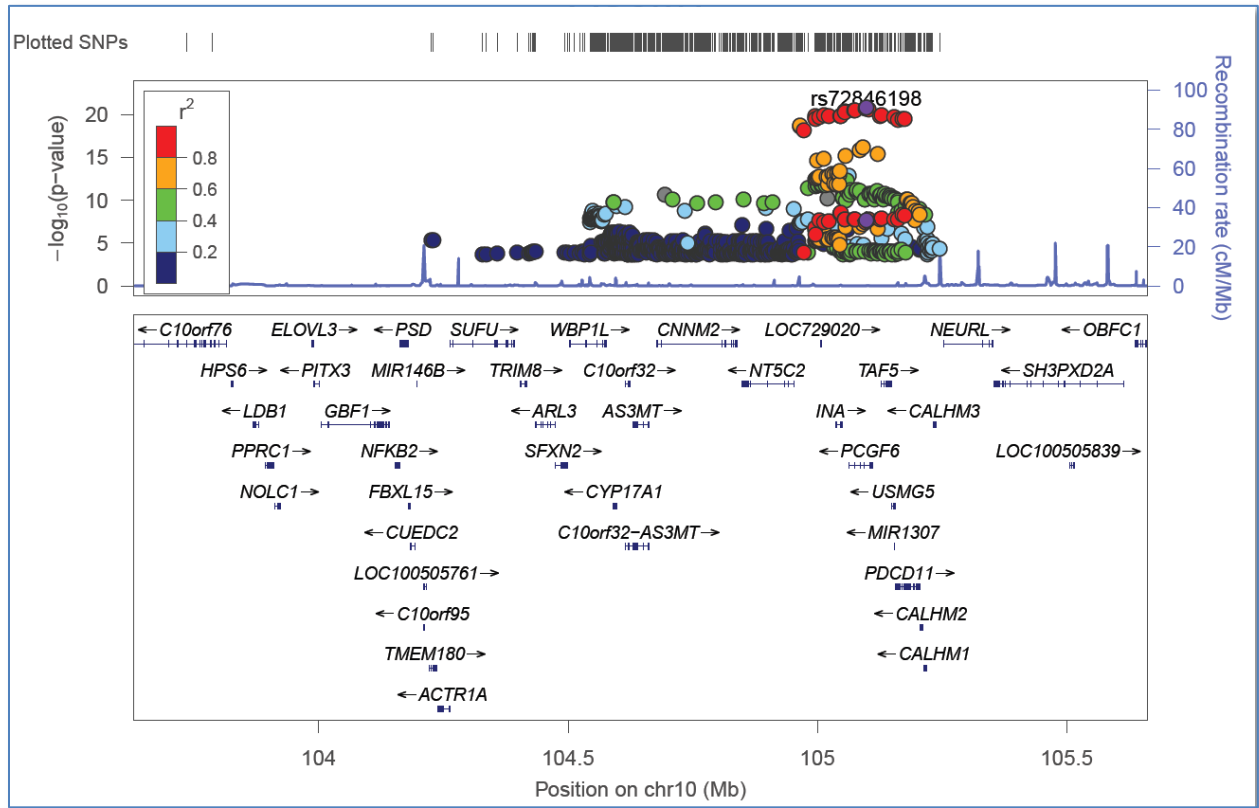

Upper panel shows  $-\log_{10}(p\text{-value})$  of eQTLs.

Figure S13. eQTLs and schizophrenia-associated *ITIH3* region

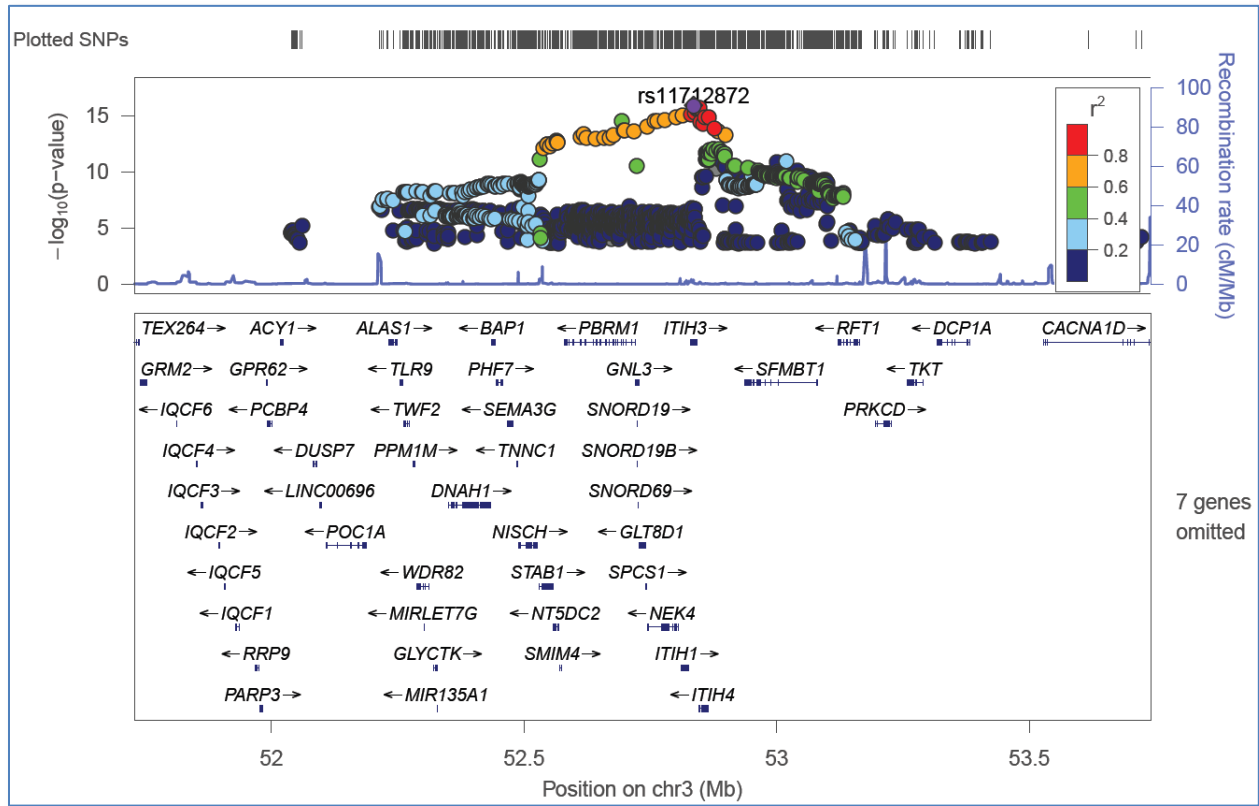

Upper panel shows  $-\log_{10}(p\text{-value})$  of eQTLs.

**Figure S14. Significant eQTL genes expressed in brain and blood**

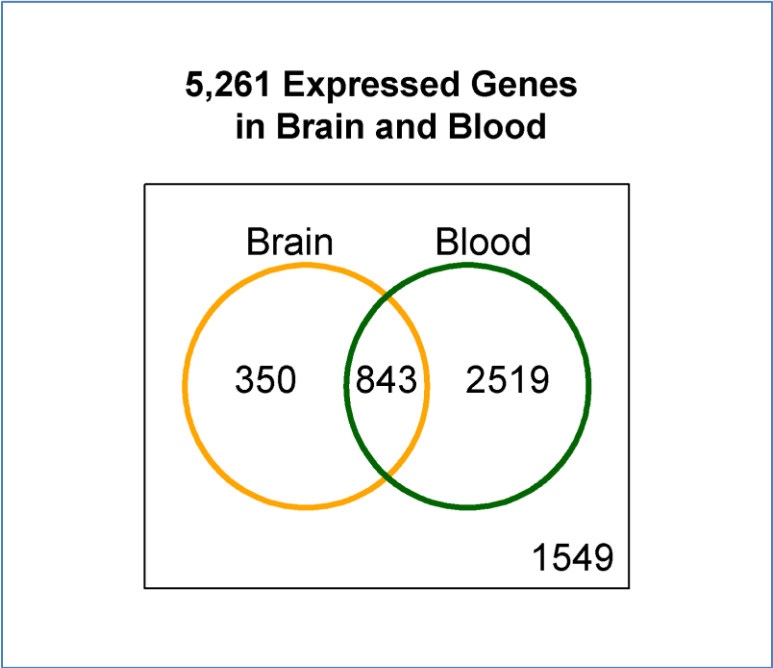

Of 5,261 genes expressed in brain and blood, 70.7% of 1,193 eQTL genes in brain were eQTL genes in blood.

Figure S15. DAPPLE protein-protein interaction graph

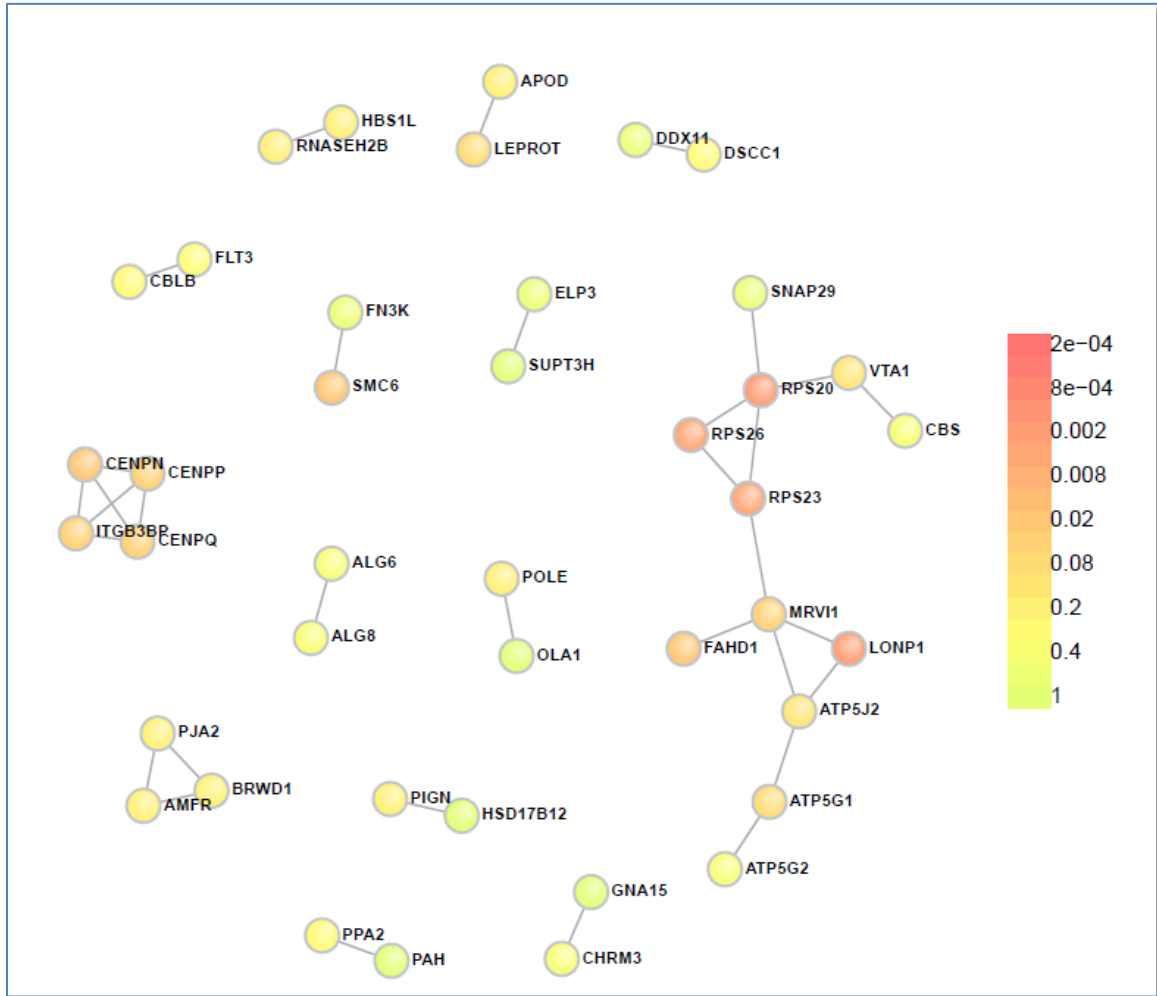

Using significant genes with evidence of local association, we performed protein-protein interaction analysis using DAPPLE. This figure shows network connectivity for directly interacting genes.

## Supplemental Tables

**Table S1. Sign test between all pairs of studies**

| From              | To                         |                            |                            |                            |                            |
|-------------------|----------------------------|----------------------------|----------------------------|----------------------------|----------------------------|
|                   | Colantuoni                 | Gibbs                      | GTEEx                      | Myers                      | SMRI                       |
| Colantuoni (n=56) | NA                         | 186/255 (73%)<br>P=6.9e-14 | 154/224 (69%)<br>P=1.0e-8  | 183/264 (69%)<br>P=1.5e-10 | 107/151 (71%)<br>P=1.5e-7  |
| Gibbs (n=125)     | 561/734 (76%)<br>P=2.2e-16 | NA                         | 470/620 (76%)<br>P=2.2e-16 | 569/714 (80%)<br>P=2.2e-16 | 320/440 (73%)<br>P=2.2e-16 |
| GTEEx (n=24)      | 61/109 (56%)<br>P=0.13     | 61/97 (63%)<br>P=0.007     | NA                         | 61/99 (62%)<br>P=0.01      | 42/68 (62%)<br>P=0.03      |
| Myers (n=190)     | 346/474 (73%)<br>P=2.2e-16 | 358/465 (77%)<br>P=2.2e-16 | 258/362 (71%)<br>P=2.2e-16 | NA                         | 227/329 (69%)<br>P=2.3e-12 |
| SMRI (n=31)       | 55/100 (55%)<br>P=0.18     | 56/95 (59%)<br>P=0.05      | 44/80 (55%)<br>P=0.22      | 58/101 (57%)<br>P=0.08     | NA                         |

SNP-gene eQTL pairs with  $p < 1 \times 10^{-5}$  were selected from the study in the “from” column, and the sign of the same association in the “To” column was assessed. For example, of 734 significant SNPs in Gibbs et al. that also passed quality control in Colantuoni et al., 561 (76%) had the same direction of association, a highly significant deviation from the null hypothesis of 50% ( $P=2.2 \times 10^{-16}$ ). In each cell, the ratio represents number of SNP-gene pairs whose t-statistic signs were the same between two studies. *P*-values were calculated using the R binom.test function. The asymmetry of the table is by design.

**Table S2. eQTL SNP-gene pairs at varying FDR cutoffs (genomic PC1)**

| FDR Threshold      | SNP-gene eQTL pairs | Unique SNPs    | Unique genes |
|--------------------|---------------------|----------------|--------------|
| q < 0.1            | 227,621             | 202,926        | 5,374        |
| <b>q &lt; 0.05</b> | <b>176,794</b>      | <b>159,151</b> | <b>3,520</b> |
| q < 0.01           | 115,839             | 105,447        | 1,797        |
| q < 0.001          | 73,814              | 68,508         | 986          |
| q < 0.0001         | 47,540              | 44,898         | 650          |

This table shows number of SNP-gene eQTL pairs at varying FDR cutoffs when genomic PC1 was included as a covariate in eQTL analyses.

**Table S3. eQTL SNP-gene pairs at varying FDR cutoffs (genomic PC1-5)**

| FDR Threshold      | SNP-gene eQTL pairs | Unique SNPs    | Unique genes |
|--------------------|---------------------|----------------|--------------|
| q < 0.1            | 233,978             | 209,864        | 6,179        |
| <b>q &lt; 0.05</b> | <b>176,566</b>      | <b>159,613</b> | <b>4,015</b> |
| q < 0.01           | 112,258             | 102,984        | 1,925        |
| q < 0.001          | 68,788              | 64,117         | 998          |
| q < 0.0001         | 44,587              | 42,039         | 642          |

This table shows number of SNP-gene eQTL pairs at varying FDR cutoffs when genomic PC1 – PC5 were included as covariates in eQTL analyses.

**Table S4. Functional consequences of eQTL SNPs versus random SNPs**

| Functional effect      | eQTL SNPs (%) | Random SNPs (%) | OR (CI)        | P-value              |
|------------------------|---------------|-----------------|----------------|----------------------|
| 5' UTR                 | 0.98          | 0.29            | 9.2 (8.2-10.3) | $< 1 \times 10^{-4}$ |
| Non-synonymous coding  | 1.04          | 0.31            | 9.0 (8.1-10.1) | $< 1 \times 10^{-4}$ |
| 3' UTR                 | 2.66          | 0.85            | 8.4 (7.9-9.0)  | $< 1 \times 10^{-4}$ |
| Synonymous coding      | 0.93          | 0.33            | 7.4 (6.7-8.2)  | $< 1 \times 10^{-4}$ |
| Splice site related    | 0.30          | 0.13            | 6.2 (5.2-7.4)  | $< 1 \times 10^{-4}$ |
| Upstream               | 7.11          | 4.45            | 4.3 (4.2-4.5)  | $< 1 \times 10^{-4}$ |
| Downstream             | 5.84          | 3.77            | 4.2 (4.0-4.3)  | $< 1 \times 10^{-4}$ |
| Intronic               | 65.91         | 50.12           | 3.5 (3.5-3.6)  | $< 1 \times 10^{-4}$ |
| Within non-coding gene | 0.61          | 0.47            | 3.5 (3.1-3.9)  | $< 1 \times 10^{-4}$ |
| Intergenic             | 14.62         | 39.29           | 1.0            | NA                   |

OR represents odds ratio (95% confidence interval) of each functional effect versus intergenic.

**Table S5. Top predicted genes for schizophrenia using SHERLOCK**

| Gene            | SNP        | chr | bp        | eQTL <i>P</i> | GWAS <i>P</i> | LBF <sup>a</sup> | Associated diseases (PubMed ID)                                                                                                                                                                                                                                                                                                                                    |
|-----------------|------------|-----|-----------|---------------|---------------|------------------|--------------------------------------------------------------------------------------------------------------------------------------------------------------------------------------------------------------------------------------------------------------------------------------------------------------------------------------------------------------------|
| <i>ALMS1</i>    | rs11899902 | 2   | 73485072  | 4.66E-07      | 2.98E-05      | 5.11             | Chronic kidney disease (20383146)<br>Creatinine levels (20383145)<br>Glomerular filtration rate (23535967)<br>Metabolic traits (21886157)<br>Metabolite levels (21931564)                                                                                                                                                                                          |
| <i>PCGEM1</i>   | rs17439755 | 2   | 194238487 | 1.41E-04      | 5.24E-05      | 4.60             | 5 major psychiatric disorders (23453885)<br>HIV-1 control (20041166)<br>Schizophrenia (21926974)                                                                                                                                                                                                                                                                   |
| <i>NGEF</i>     | rs11535    | 2   | 233451776 | 1.02E-05      | 5.14E-06      | 5.95             | SCZ (23974872)                                                                                                                                                                                                                                                                                                                                                     |
| <i>NEK4</i>     | rs2590838  | 3   | 52597126  | 8.54E-05      | 3.53E-05      | 4.23             | Bipolar disorder (19416921; 21926972)                                                                                                                                                                                                                                                                                                                              |
| <i>GNL3</i>     | rs1108842  | 3   | 52695120  | 4.60E-05      | 3.82E-05      | 4.42             | Adiponectin levels (22479202)<br>Bipolar disorder (21926972; 23092984)<br>Schizophrenia (23974872)<br>Osteoarthritis (22763110)                                                                                                                                                                                                                                    |
| <i>GLT8D1</i>   | rs736408   | 3   | 52810394  | 1.52E-06      | 1.19E-06      | 5.68             | 5 major psychiatric disorders (23453885)<br>Bipolar disorder (21926972)<br>Osteoarthritis (22763110)                                                                                                                                                                                                                                                               |
| <i>ITIH4</i>    | rs736408   | 3   | 52810394  | 4.28E-07      | 1.19E-06      | 5.41             | Bipolar (21926972)<br>Immune response to smallpox (22610502)<br>Schizophrenia (21926974)<br>Ulcerative colitis (23128233)                                                                                                                                                                                                                                          |
| <i>MEF2C</i>    | rs410216   | 5   | 88039857  | 1.97E-05      | 2.09E-05      | 4.22             | Bone mineral density (21533022; 22504420; 23572186; 19801982)<br>Height (20881960)<br>Mean platelet volume (22139419)<br>Obesity-related traits (23251661)<br>Platelet counts (22139419)<br>Retinal vascular caliber (21060863)<br>Sex hormone-binding globulin levels (22675492)<br>Thiazide-induced adverse metabolic effects (23400010)<br>Tonometry (17903302) |
| <i>GPR146</i>   | rs11762834 | 7   | 1862167   | 3.79E-05      | 1.25E-08      | 5.62             | Schizophrenia (23974872)                                                                                                                                                                                                                                                                                                                                           |
| <i>TFAMP1</i>   | rs3800924  | 7   | 2154775   | 1.12E-13      | 3.56E-08      | 6.50             | Schizophrenia (23974872)                                                                                                                                                                                                                                                                                                                                           |
| <i>FTSJ2</i>    | Rs6971396  | 7   | 2310729   | 4.58E-05      | 4.21E-05      | 4.71             | 5 major psychiatric disorders (23453885)                                                                                                                                                                                                                                                                                                                           |
| <i>MED30</i>    | rs10105834 | 8   | 118684632 | 3.32E-07      | 5.68E-05      | 4.23             | Kawasaki disease (22446961)                                                                                                                                                                                                                                                                                                                                        |
| <i>MASTL</i>    | rs4749219  | 10  | 27383238  | 7.29E-07      | 1.14E-05      | 4.55             |                                                                                                                                                                                                                                                                                                                                                                    |
| <i>RHOBTB1</i>  | rs16914993 | 10  | 61842440  | 1.58E-05      | 1.31E-05      | 6.33             | Diastolic blood pressure (19430483)                                                                                                                                                                                                                                                                                                                                |
| <i>CALHM1</i>   | rs12219246 | 10  | 104603345 | 1.37E-04      | 9.40E-11      | 5.61             |                                                                                                                                                                                                                                                                                                                                                                    |
| <i>C10orf32</i> | rs7096169  | 10  | 104608685 | 3.76E-05      | 1.83E-11      | 4.58             | 5 major psychiatric disorders (23453885)<br>Schizophrenia (23974872)<br>Parkinson's disease (19915575)                                                                                                                                                                                                                                                             |



|          |            |    |           |          |           |      |                                                                                                                                |
|----------|------------|----|-----------|----------|-----------|------|--------------------------------------------------------------------------------------------------------------------------------|
| AS3MT    | rs7085104  | 10 | 104618863 | 3.18E-06 | 1.07E-11  | 6.10 | 5 major psychiatric disorders (23453885)<br>Schizophrenia (23894747)<br>Systolic blood pressure (19430483)                     |
| USMG5    | rs10786736 | 10 | 104839106 | 7.08E-08 | 4.01E-08  | 5.64 | Schizophrenia (23974872)                                                                                                       |
| SNX19    | rs3751039  | 11 | 130278286 | 5.94E-07 | 5.02E-06  | 4.21 | Schizophrenia (22688191; 21926974)                                                                                             |
| VSIG10   | rs3825102  | 12 | 116204568 | 1.47E-04 | 1.39E-5   | 4.80 | Obesity-related traits (23251661)                                                                                              |
| MPHOSPH9 | rs7299943  | 12 | 122159438 | 5.59E-05 | 1.48E-05  | 5.11 | Multiple sclerosis (19525953)                                                                                                  |
| OGFOD2   | rs1969354  | 12 | 122307729 | 2.76E-05 | 5.99E-06  | 5.61 | Platelet counts (21507922)                                                                                                     |
| CORO7    | rs6500596  | 16 | 4410028   | 6.90E-05 | 2.77E-06  | 4.94 |                                                                                                                                |
| NMRAL1   | rs1362626  | 16 | 4489227   | 1.96E-05 | 2.63E-05  | 5.09 |                                                                                                                                |
| CMTM1    | rs2290182  | 16 | 65171509  | 9.23E-08 | 0.0001398 | 4.28 |                                                                                                                                |
| SRR      | rs4523957  | 17 | 2155649   | 4.98E-07 | 3.01E-07  | 6.10 | Aortic root size (19584346)<br>Coronary heart disease (21378990)<br>Metabolite levels (23319000)<br>Type 2 diabetes (20174558) |
| NAGA     | rs5751191  | 22 | 40700937  | 7.95E-08 | 9.02E-05  | 4.23 |                                                                                                                                |

The extended MHC region (chr6: 25Mb-334Mb) was removed due to high LD. Five major psychiatric disorders refers to ADHD, autism, bipolar disorder, major depressive disorder, and schizophrenia.

<sup>a</sup> : Log of Bayes factor.

**Table S6. Top annotation clusters identified by DAVID**

| Category             | Term                                                                                                 | Count | Fold Enrichment | Benjamini |
|----------------------|------------------------------------------------------------------------------------------------------|-------|-----------------|-----------|
| Annotation Cluster 1 | Enrichment Score: 8.49                                                                               |       |                 |           |
| GOTERM_CC_FAT        | GO:0005739~mitochondrion                                                                             | 255   | 1.56            | 1.09E-11  |
| GOTERM_CC_FAT        | GO:0044429~mitochondrial part                                                                        | 135   | 1.51            | 1.39E-04  |
| GOTERM_CC_FAT        | GO:0005759~mitochondrial matrix                                                                      | 62    | 1.82            | 5.17E-04  |
| GOTERM_CC_FAT        | GO:0031980~mitochondrial lumen                                                                       | 62    | 1.82            | 5.17E-04  |
| Annotation Cluster 2 | Enrichment Score: 4.03                                                                               |       |                 |           |
| GOTERM_BP_FAT        | GO:0051186~cofactor metabolic process                                                                | 56    | 1.88            | 0.010015  |
| GOTERM_BP_FAT        | GO:0006732~coenzyme metabolic process                                                                | 47    | 2.01            | 0.005036  |
| GOTERM_BP_FAT        | GO:0051188~cofactor biosynthetic process                                                             | 27    | 1.83            | 0.279835  |
| GOTERM_BP_FAT        | GO:0009108~coenzyme biosynthetic process                                                             | 20    | 1.90            | 0.453828  |
| Annotation Cluster 3 | Enrichment Score: 3.77                                                                               |       |                 |           |
| GOTERM_MF_FAT        | GO:0050662~coenzyme binding                                                                          | 52    | 1.86            | 0.011634  |
| GOTERM_MF_FAT        | GO:0048037~cofactor binding                                                                          | 64    | 1.67            | 0.023209  |
| GOTERM_MF_FAT        | GO:0050660~FAD binding                                                                               | 23    | 2.07            | 0.142117  |
| GOTERM_MF_FAT        | GO:0009055~electron carrier activity                                                                 | 47    | 1.38            | 0.802524  |
| Annotation Cluster 4 | Enrichment Score: 3.40                                                                               |       |                 |           |
| GOTERM_CC_FAT        | GO:0000323~lytic vacuole                                                                             | 52    | 1.64            | 0.047607  |
| GOTERM_CC_FAT        | GO:0005764~lysosome                                                                                  | 52    | 1.64            | 0.047607  |
| GOTERM_CC_FAT        | GO:0005773~vacuole                                                                                   | 55    | 1.45            | 0.131342  |
| Annotation Cluster 5 | Enrichment Score: 3.21                                                                               |       |                 |           |
| GOTERM_MF_FAT        | GO:0016814~hydrolase activity, acting on carbon-nitrogen (but not peptide) bonds, in cyclic amidines | 15    | 3.14            | 0.041012  |
| GOTERM_MF_FAT        | GO:0019239~deaminase activity                                                                        | 13    | 3.37            | 0.048278  |
| GOTERM_MF_FAT        | GO:0004000~adenosine deaminase activity                                                              | 5     | 4.06            | 0.773977  |
| Annotation Cluster 6 | Enrichment Score: 2.90                                                                               |       |                 |           |
| GOTERM_CC_FAT        | GO:0044429~mitochondrial part                                                                        | 135   | 1.51            | 1.39E-04  |
| GOTERM_CC_FAT        | GO:0031966~mitochondrial membrane                                                                    | 83    | 1.40            | 0.132058  |
| GOTERM_CC_FAT        | GO:0031967~organelle envelope                                                                        | 122   | 1.31            | 0.116647  |
| GOTERM_CC_FAT        | GO:0031090~organelle membrane                                                                        | 201   | 1.22            | 0.110334  |
| GOTERM_CC_FAT        | GO:0031975~envelope                                                                                  | 122   | 1.31            | 0.097985  |
| GOTERM_CC_FAT        | GO:0005740~mitochondrial envelope                                                                    | 86    | 1.37            | 0.093481  |
| GOTERM_CC_FAT        | GO:0019866~organelle inner membrane                                                                  | 69    | 1.40            | 0.119952  |
| GOTERM_CC_FAT        | GO:0005743~mitochondrial inner membrane                                                              | 63    | 1.37            | 0.205259  |
| GOTERM_CC_FAT        | GO:0044455~mitochondrial membrane part                                                               | 30    | 1.60            | 0.23615   |

**Table S7. Top 50 Gene Ontology pathways identified by InRich**

| GO ID      | Type | Name                                        | size | N.int | Empical P | Adjusted P |
|------------|------|---------------------------------------------|------|-------|-----------|------------|
| GO:0005739 | CC   | <b>mitochondrion</b>                        | 1191 | 350   | 1.00E-05  | 0.039296   |
| GO:0005759 | CC   | <b>mitochondrial matrix</b>                 | 185  | 74    | 1.00E-05  | 0.039296   |
| GO:0003735 | MF   | structural constituent of ribosome          | 151  | 62    | 1.00E-05  | 0.039296   |
| GO:0005840 | CC   | ribosome                                    | 166  | 63    | 1.00E-05  | 0.039296   |
| GO:0006412 | BP   | translation                                 | 225  | 84    | 1.00E-05  | 0.039296   |
| GO:0010467 | BP   | gene expression                             | 364  | 127   | 1.00E-05  | 0.039296   |
| GO:0005743 | CC   | <b>mitochondrial inner membrane</b>         | 263  | 90    | 2E-05     | 0.051395   |
| GO:0000278 | BP   | mitotic cell cycle                          | 286  | 97    | 2E-05     | 0.051395   |
| GO:0016491 | MF   | oxidoreductase activity                     | 386  | 120   | 3E-05     | 0.066993   |
| GO:0000166 | MF   | nucleotide binding                          | 1889 | 483   | 3E-05     | 0.066993   |
| GO:0044267 | BP   | cellular protein metabolic process          | 263  | 90    | 3E-05     | 0.066993   |
| GO:0016740 | MF   | transferase activity                        | 551  | 166   | 4E-05     | 0.081092   |
| GO:0003676 | MF   | nucleic acid binding                        | 681  | 178   | 5E-05     | 0.09589    |
| GO:0003723 | MF   | RNA binding                                 | 553  | 160   | 5E-05     | 0.09589    |
| GO:0022904 | BP   | respiratory electron transport chain        | 81   | 35    | 7E-05     | 0.121788   |
| GO:0005654 | CC   | nucleoplasm                                 | 822  | 219   | 0.00011   | 0.175782   |
| GO:0055114 | BP   | oxidation-reduction process                 | 194  | 66    | 0.00013   | 0.20058    |
| GO:0005975 | BP   | carbohydrate metabolic process              | 272  | 87    | 0.00014   | 0.212179   |
| GO:0004497 | MF   | monooxygenase activity                      | 58   | 23    | 0.00015   | 0.225977   |
| GO:0006418 | BP   | tRNA aminoacylation for protein translation | 40   | 21    | 0.00016   | 0.237076   |
| GO:0015030 | CC   | Cajal body                                  | 42   | 22    | 0.00018   | 0.259674   |
| GO:0006414 | BP   | translational elongation                    | 88   | 33    | 0.0002    | 0.284872   |
| GO:0005761 | CC   | mitochondrial ribosome                      | 22   | 14    | 0.00025   | 0.340166   |
| GO:0005861 | CC   | troponin complex                            | 8    | 6     | 0.00027   | 0.362264   |
| GO:0000084 | BP   | S phase of mitotic cell cycle               | 108  | 41    | 0.0003    | 0.393461   |
| GO:0000087 | BP   | M phase of mitotic cell cycle               | 89   | 37    | 0.00032   | 0.411759   |
| GO:0016071 | BP   | mRNA metabolic process                      | 208  | 65    | 0.00032   | 0.411759   |
| GO:0005764 | CC   | lysosome                                    | 160  | 58    | 0.0005    | 0.561244   |
| GO:0005681 | CC   | spliceosomal complex                        | 73   | 30    | 0.00051   | 0.567443   |
| GO:0016070 | BP   | RNA metabolic process                       | 238  | 74    | 0.00052   | 0.572143   |
| GO:0005783 | CC   | endoplasmic reticulum                       | 871  | 234   | 0.00053   | 0.578842   |
| GO:0003674 | MF   | molecular_function                          | 523  | 147   | 0.0006    | 0.627037   |
| GO:0005829 | CC   | cytosol                                     | 1940 | 459   | 0.0006    | 0.627037   |
| GO:0006415 | BP   | translational termination                   | 80   | 30    | 0.00061   | 0.633337   |
| GO:0016254 | BP   | preassembly of GPI anchor in ER membrane    | 15   | 10    | 0.00066   | 0.661234   |
| GO:0005789 | CC   | endoplasmic reticulum membrane              | 551  | 153   | 0.00067   | 0.665533   |
| GO:0019058 | BP   | viral infectious cycle                      | 84   | 31    | 0.00067   | 0.665533   |
| GO:0031080 | CC   | Nup107-160 complex                          | 10   | 8     | 0.00087   | 0.758224   |
| GO:0005524 | MF   | ATP binding                                 | 1362 | 361   | 0.00124   | 0.871713   |
| GO:0006783 | BP   | heme biosynthetic process                   | 17   | 11    | 0.0013    | 0.884812   |
| GO:0000236 | BP   | mitotic prometaphase                        | 79   | 32    | 0.00136   | 0.894011   |
| GO:0006457 | BP   | protein folding                             | 170  | 56    | 0.00139   | 0.89821    |

|            |    |                                                                                   |     |    |         |          |
|------------|----|-----------------------------------------------------------------------------------|-----|----|---------|----------|
| GO:0051301 | BP | cell division                                                                     | 258 | 80 | 0.00141 | 0.90091  |
| GO:0006778 | BP | porphyrin-containing compound metabolic process                                   | 15  | 9  | 0.00156 | 0.921208 |
| GO:0008137 | MF | NADH dehydrogenase (ubiquinone) activity                                          | 36  | 18 | 0.00158 | 0.924308 |
| GO:0000389 | BP | nuclear mRNA 3'-splice site recognition                                           | 5   | 5  | 0.00161 | 0.928207 |
| GO:0006165 | BP | nucleoside diphosphate phosphorylation                                            | 5   | 4  | 0.002   | 0.960604 |
| GO:0019885 | BP | antigen processing and presentation of endogenous peptide antigen via MHC class I | 6   | 5  | 0.00204 | 0.962604 |
| GO:0006098 | BP | pentose-phosphate shunt                                                           | 10  | 7  | 0.00205 | 0.963604 |
| GO:0006120 | BP | mitochondrial electron transport, NADH to ubiquinone                              | 35  | 17 | 0.00209 | 0.965203 |

To adjust for common biases due to gene size, LD within and between genes, and pathway sizes, we generated a set of independent, nominally associated genomic intervals using clumping implemented in PLINK and then tested it for enrichment in GO gene sets using InRich. Analysis was restricted to 4,074 GO categories containing genes between 5 and 3000 to account for pathway sizes. We used 100K times of permutation to get empirical p-values per pathway and 10K times of permutation to obtain multiple-testing corrected p-values. Multiple GO pathways related to mitochondrial structure and function were ranked as top pathways. This result is consistent with gene-based DAVID results, indicating that mitochondrial pathways are robust findings regardless of different gene-set enrichment methods. Size: number of gene in each GO category, N.int: number of intervals overlapped with genes in each GO category.

## References

1. Wright, F.A. et al. Heritability and genomics of gene expression in peripheral blood. *Nat Genet* **46**, 430-7 (2014).
2. Langmead, B., Trapnell, C., Pop, M. & Salzberg, S.L. Ultrafast and memory-efficient alignment of short DNA sequences to the human genome. *Genome Biol* **10**, R25 (2009).
3. Altshuler, D.M. et al. Integrating common and rare genetic variation in diverse human populations. *Nature* **467**, 52-8 (2010).
4. Durbin, R.M. et al. A map of human genome variation from population-scale sequencing. *Nature* **467**, 1061-73 (2010).
5. Ramasamy, A. et al. Resolving the polymorphism-in-probe problem is critical for correct interpretation of expression QTL studies. *Nucleic Acids Res* **41**, e88 (2013).
6. Wright, F. et al. Heritability and genomics of gene expression in peripheral blood. (Submitted).
7. Colantuoni, C. et al. Temporal dynamics and genetic control of transcription in the human prefrontal cortex. *Nature* **478**, 519-23 (2011).
8. Gibbs, J.R. et al. Abundant quantitative trait loci exist for DNA methylation and gene expression in human brain. *PLoS Genetics* **6**, e1000952 (2010).
9. Lonsdale, J. The Genotype-Tissue Expression (GTEx) project. *Nat Genet* **45**, 580-5 (2013).
10. Myers, A.J. et al. A survey of genetic human cortical gene expression. *Nat Genet* **39**, 1494-9 (2007).
11. Torrey, E.F. et al. Neurochemical markers for schizophrenia, bipolar disorder, and major depression in postmortem brains. *Biol Psychiatry* **57**, 252-60 (2005).
12. Torrey, E.F., Webster, M., Knable, M., Johnston, N. & Yolken, R.H. The stanley foundation brain collection and neuropathology consortium. *Schizophr Res* **44**, 151-5 (2000).
13. Liu, E.Y., Li, M., Wang, W. & Li, Y. MaCH-admix: genotype imputation for admixed populations. *Genet Epidemiol* **37**, 25-37 (2013).
14. Liu, E.Y. et al. Genotype imputation of MetaboChip SNPs using a study-specific reference panel of ~4,000 haplotypes in African Americans from the Women's Health Initiative. *Genet Epidemiol* **36**, 107-17 (2012).
